# Supplementary material for: In Vivo Imaging of Acute Hindlimb Ischaemia in Rat Model: A Pre-Clinical PET Study
Source: MDPI journal article supplement (doi:10.3390/pharmaceutics16040542), 2024-04-15
Supplement: s1 [file s1]

Supplementary Figure S1.

The complete (unedited) Western blot images provided in the manuscript.

APN/CD 13

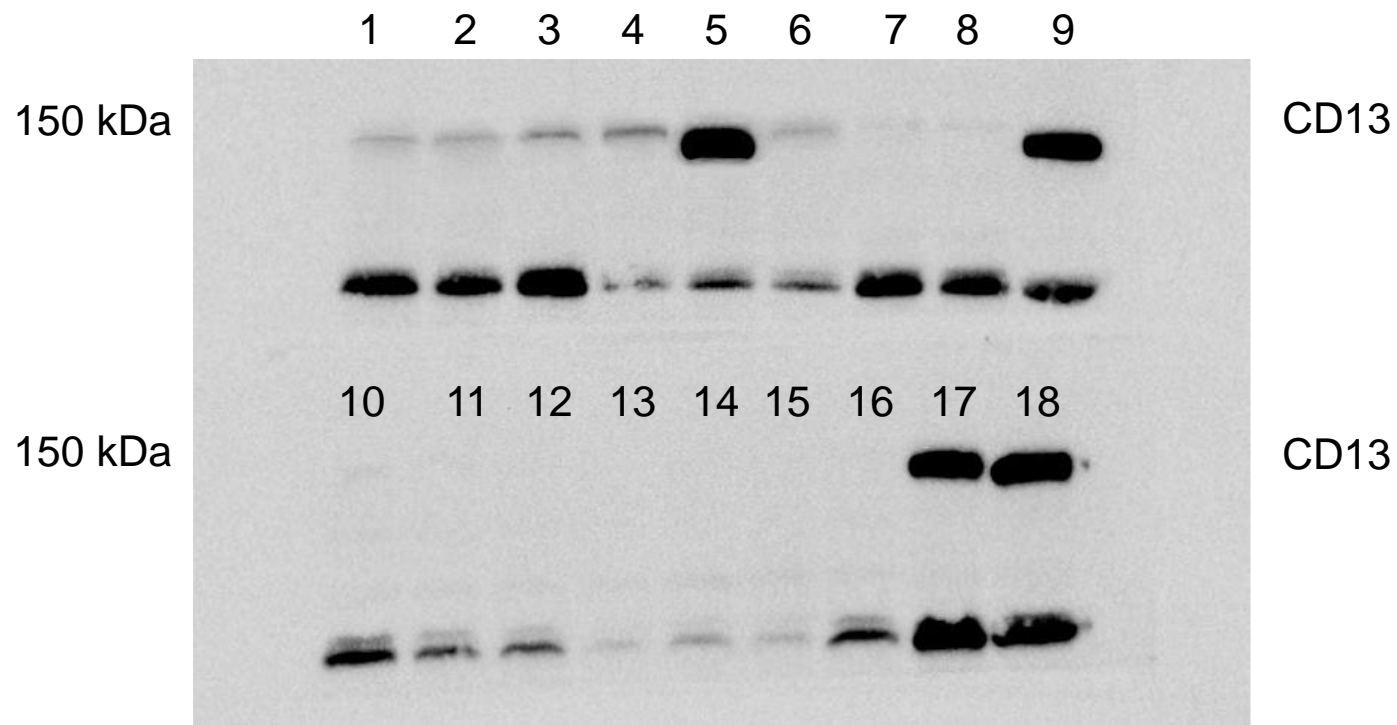

HPRT housekeeping gene

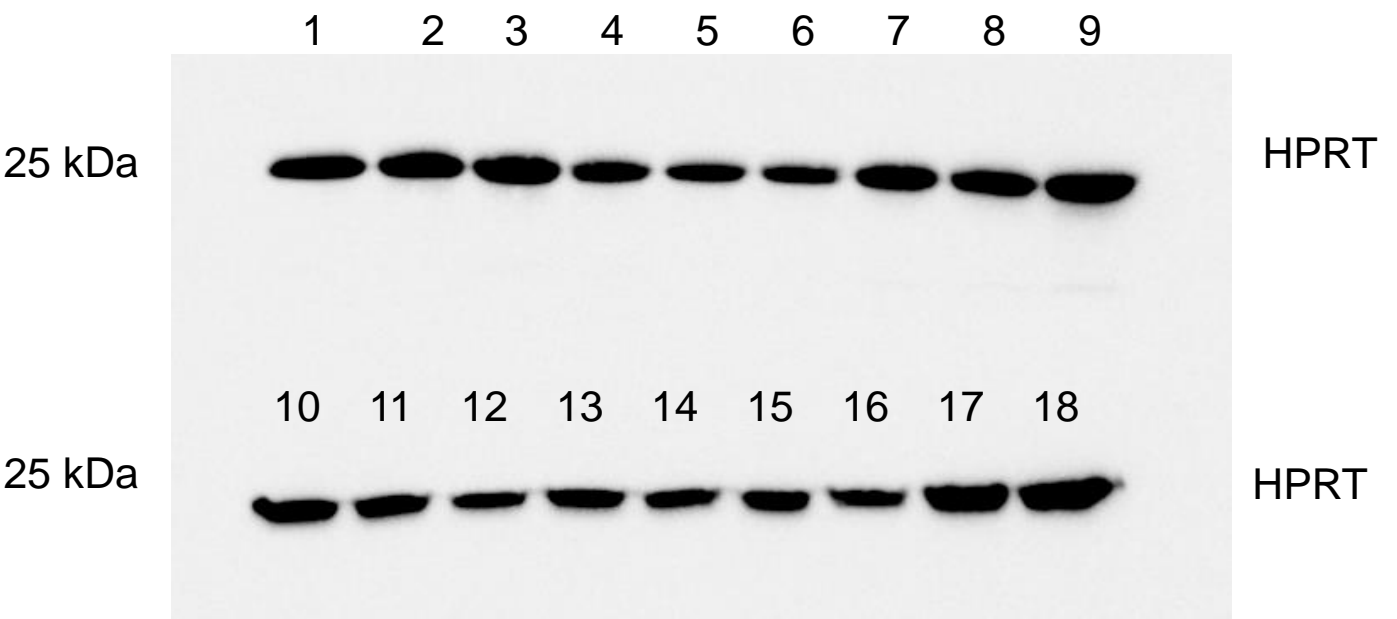

- |                                  |                             |                            |
|----------------------------------|-----------------------------|----------------------------|
| 1: I/R group at day 1            | 7: Non-I/R group at day 1   | 13: Control group at day 1 |
| 2: I/R group at day 3            | 8: Non-I/R group at day 3   | 14: Control group at day 3 |
| 3: I/R group at day 5            | 9: Rat kidney               | 15: Control group at day 5 |
| 4: I/R group at day 7            | 10: Non-I/R group at day 5  | 16: Control group at day 7 |
| 5: Rat kidney (positive control) | 11: Non-I/R group at day 7  | 17: Rat kidney             |
| 6: I/R group at day 10           | 12: Non-I/R group at day 10 | 18: Rat kidney             |

Supplementary Figure S1.

The complete (unedited) Western blot images provided in the manuscript.

APN/CD 13

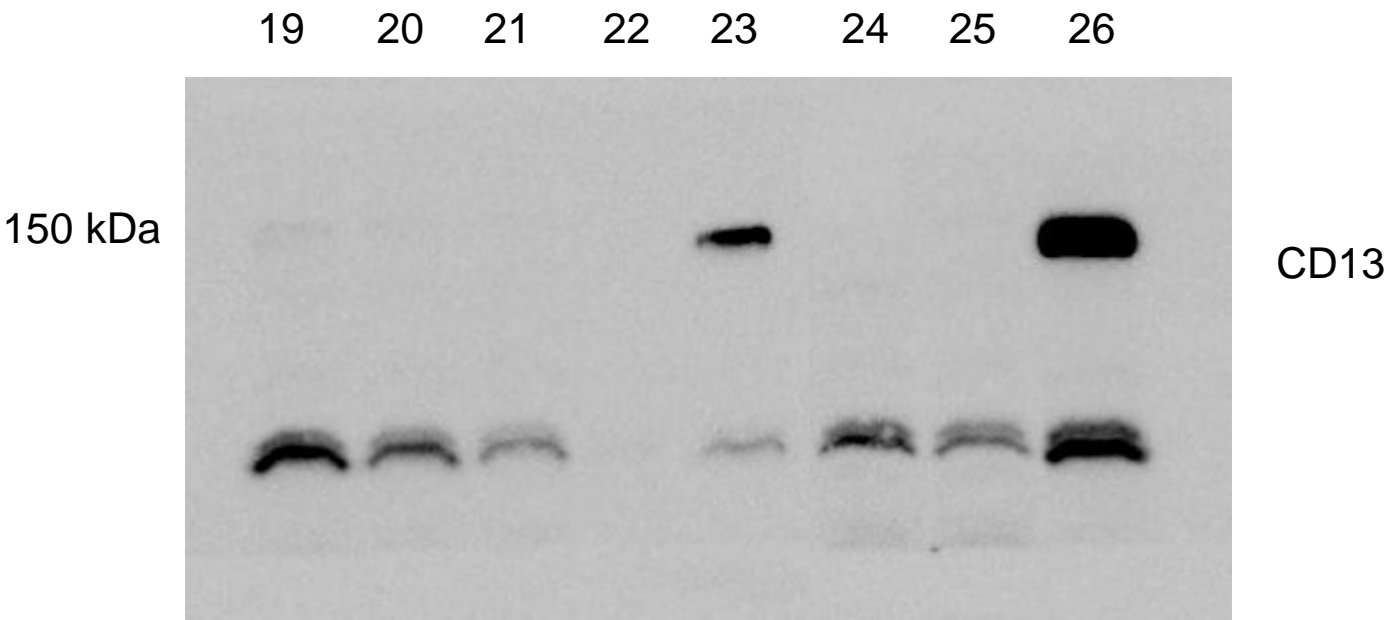

HPRT housekeeping gene

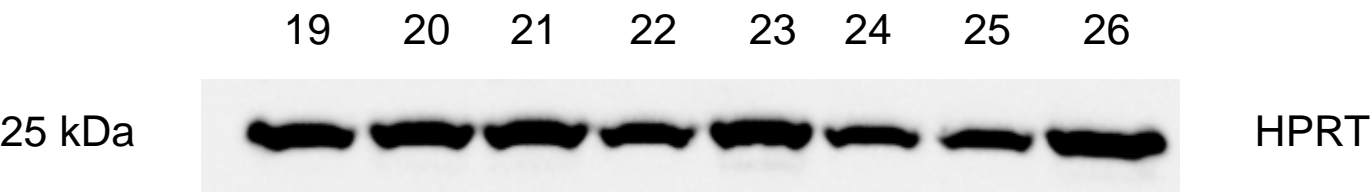

- 19: Control group at day 10
- 20: Control group at day 1
- 21: Control group at day 3
- 22: Control group at day 5
- 23: Rat kidney
- 24: Control group at day 7
- 25: Control group at day 10
- 26: Rat kidney
